# Supplementary material
Source: PubMed Central journal article supplement (PMC6510997)
Supplement: pnas.1818347116.sapp.pdf [file pnas.1818347116.sapp.pdf]

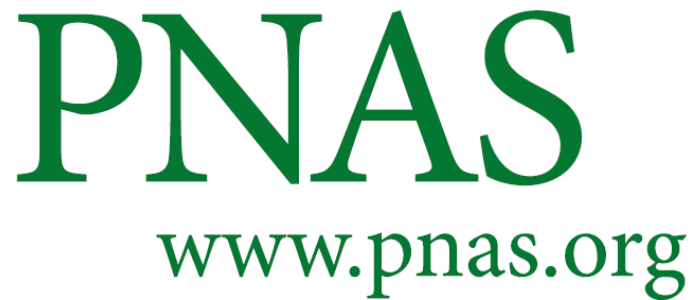

## Supplementary Information for

### **MAPK pathway and B cells over-activation in Multiple Sclerosis: a phosphoproteomics – genomic analysis**

**Author:** Ekaterina Kotelnikova, PhD<sup>1,2,3</sup>, Narsis A Kiani, PhD<sup>4</sup>, Dimitris Messinis, PhD<sup>5</sup>, Inna Pertsovskaya, PhD<sup>1</sup>, Vicky Pliaka, BSc<sup>5,6</sup>, Melanie Rinas, PhD<sup>7</sup>, Marti Bernardo-Faura, PhD<sup>8</sup>, Gemma Vila, BSc<sup>1</sup>, Irati Zubizarreta, MD<sup>1</sup>, Irene Pulido-Valdeolivas, MD<sup>1</sup>, Theodore Sakellaropoulos, PhD<sup>6</sup>, Wolfgang Faigle, PhD<sup>9</sup>, Gilad Silberberg, PhD<sup>4</sup>, Mar Masso, BSc<sup>10</sup>, Pernilla Stridh, PhD<sup>11</sup>, Janina Behrens, MD<sup>12</sup>, Tomas Olsson, MD<sup>11</sup>, Roland Martin, MD<sup>9</sup>, Friedemann Paul, MD<sup>12,13</sup>, Jesper Tegner, PhD<sup>4</sup>, Leonidas G Alexopoulos, PhD<sup>5,6</sup>, Julio Saez-Rodriguez, PhD<sup>8,9</sup>, Pablo Villoslada, MD<sup>1\*</sup>

Corresponding author: Pablo Villoslada, Centre Cellex 3A, Casanova 145, Barcelona 08036, Spain.

Email: [pvilloslada@clinic.ub.es](mailto:pvilloslada@clinic.ub.es)

#### **This PDF file includes:**

Supplementary text  
Figs. S1 to S2  
Tables S1 to S11

#### **Other supplementary materials for this manuscript include the following:**

Dataset S1

## Supplementary Information Text

### Supplementary Methods

#### *Samples and processing*

Unified standard operating procedures (SOPs) were defined to isolate, stimulate and lyse PBMCs, for storing and shipping samples, for conducting xMAP, genotyping and cytometry assays. In addition, a kit was produced centrally to process the samples that contained the necessary reagents and buffers. The reagents were prepared from a single batch and the plates were prepared from a single batch for each stimulus. QC checks were carried out to ensure that the reagents remained stable for 3 months.

#### *xMAP assays*

xMAP assays were performed blinded at ProtAtOnce (Athens, Greece) (technicians were unaware of the clinical characteristics and group of the samples). We optimized the assays from a list of 70 candidates based in QC checks and the signal to noise analysis and obtained a final list of 17 phosphoproteins with optimized assays: AKT1, CREB1, FAK1, GSK3A, HSPB1, IKBA, JUN, MK03, MK12, MP2K1, PTN11, STA5A, STAT1, STAT3, STAT6, TF65, WNK1 (**Table S2**). The assays were standardized to minimize the errors and be robust against freezing and storage process. We used a set of 19 stimuli that included: pro-inflammatory and pro-oxidant stimuli (Anti-CD3, ConA, H2O2, IFNG, IL1A, IL6, LPS, NaCl, PolyIC, TNFA); immunomodulatory stimuli (IFNB1a, S1P, vitD3); neuroprotectants and anti-oxidants (BDNF, EGCG, INS); and MS DMDs (DMF, FTY, Teriflunomide) (**Table S3**). Such stimuli are known to activate several pathways known being associated with MS pathogenesis (e.g. MAPK, NfKB or STAT) or trigger the activation of DMDs receptors (**Fig. 1**). The samples were collected at the baseline (time 0), and 5 and 25 min after stimulation. All the data was normalized after reading the signals.

#### *Phosphoprotein Analysis*

To normalize the phosphoproteomic datasets in order to perform protein-to-protein and condition-to-condition comparisons, the changes in phosphorylation for each protein and each patient were calculated with respect to the control conditions(1). The significance of the differential phosphorylation of each protein was used to determine the degree of correction needed to perform the analysis. Since the phosphorylation of different proteins was tested in several conditions (after stimulation and in control medium), the phosphorylation of each protein in response to stimulation was defined as the log<sub>2</sub> of the response to the stimulus relative to the response to the medium. These values were normally distributed, allowing a T-test to be used for group comparisons.

## ***Cytometry***

Whole blood was collected in sodium-heparin tubes, lysed immediately and fixed with the BD Lys/Fix solution, and processed according to the manufacturer's instructions. Washed cells were permeabilized with ice cold 95% methanol at room temperature for 10 min and stored at -80 °C. Two hours after collection of the last sample, all the patient's samples were washed three times and stained with the antibodies (**Table S6**). All antibodies were titrated for optimal separation and staining, and the cells for each staining cocktail were obtained from an average of 200 µl whole blood. Samples were run on a BD Canto apparatus, and the BD Cytometry Setup and Tracking beads were used for standardization of the application, while BD compensation beads were used for electronic compensation. Compensation was evaluated by single and dual staining for optimal compensation parameters. Four subtypes of immune cells were identified and gated: CD4<sup>+</sup> cells (CD4); CD8<sup>+</sup> cells (CD8); B cells (CD19); and monocytes (CD33). An average of about 40,000 events were collected on lymphocyte gate.

## ***Genotyping***

Genotyping was performed on DNA samples collected from the subjects, assessing SNPs previously validated as associated with MS(2). The final list includes 112 SNPs, including 1 SNP associated with HLA-DRB1\*1501 (**Table S4**). The SNPs associated with MS were analyzed using a Sequenom MassArray system at the Spanish Center for Genotyping (<http://www.usc.es/cegen>).

## ***Statistical and bioinformatic Analysis***

In order to test for significant differences between patient subgroups, we performed different types of statistical testing applied to both the normalized baseline phosphorylation as well as the responses to stimulation. First, we compared pairs of groups using a Wilcoxon test (for normalized phosphorylation at baseline) or a T-test (for responses to stimuli) using R software. We then tested if the genotype might affect the differences in phosphorylation between the distinct subgroups using two-way ANOVA, and with each SNP as a first independent factor and the patient group as a second factor. Patient subgroups and SNPs that were found to be significant using ANOVA were analyzed in detail by performing pairwise comparisons between patient groups for each SNP. The false discovery rate was always corrected using the Benjamini-Hochberg procedure (reported as significant when FDR <0.05).

Protein network analysis was conducted using publicly available igraph and iRefR R packages to access iRefIndex physical interactions(3) as well as MetaCore/Metabase network (<https://clarivate.com/products/metacore>) to access additional types of interactions. We utilized TieDie algorithm(4) implemented in the Computational Biology Methods for Drug Discovery (CBDD) R package (<https://cbdd.clarivate.com/cbdd/about>) in order to find potentially causative directed pathway connecting SNPs with corresponding affected phosphoproteins. We used iRefIndex consolidated database of molecular interactions(3) and the MetaBase/MetaCore to get physical interactions connecting SNP-related genes of interest with the corresponding kinases. We also complemented these findings with potentially SNP-disturbed mechanisms of transcriptional regulation. To do that we have exploited the

MetaBase/MetaCore network, and TieDie algorithm that searches interconnecting genes on a background network using a diffusion strategy

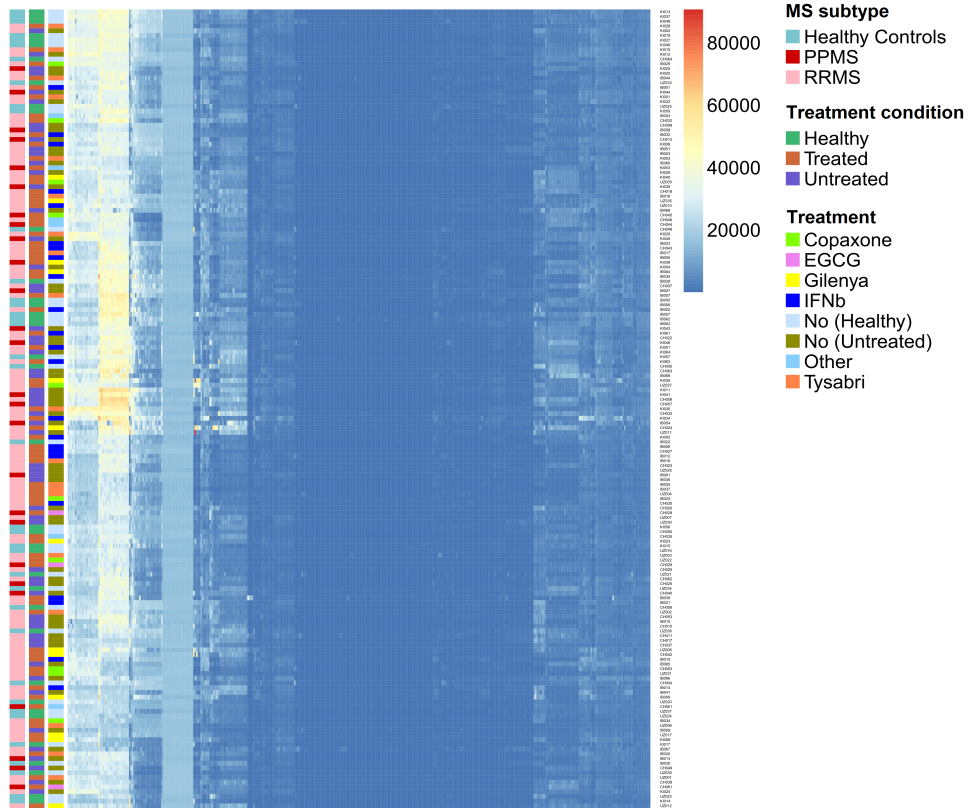

**Supplementary figure S1. Phosphoprotein levels in healthy controls and in patients with MS.**

Heat map of the raw phosphorylation levels (after normalization) annotated for different disease subtypes and treatments. Imputation of the missing values using knn: k=10 for each cpp 10 nearest patients/samples.

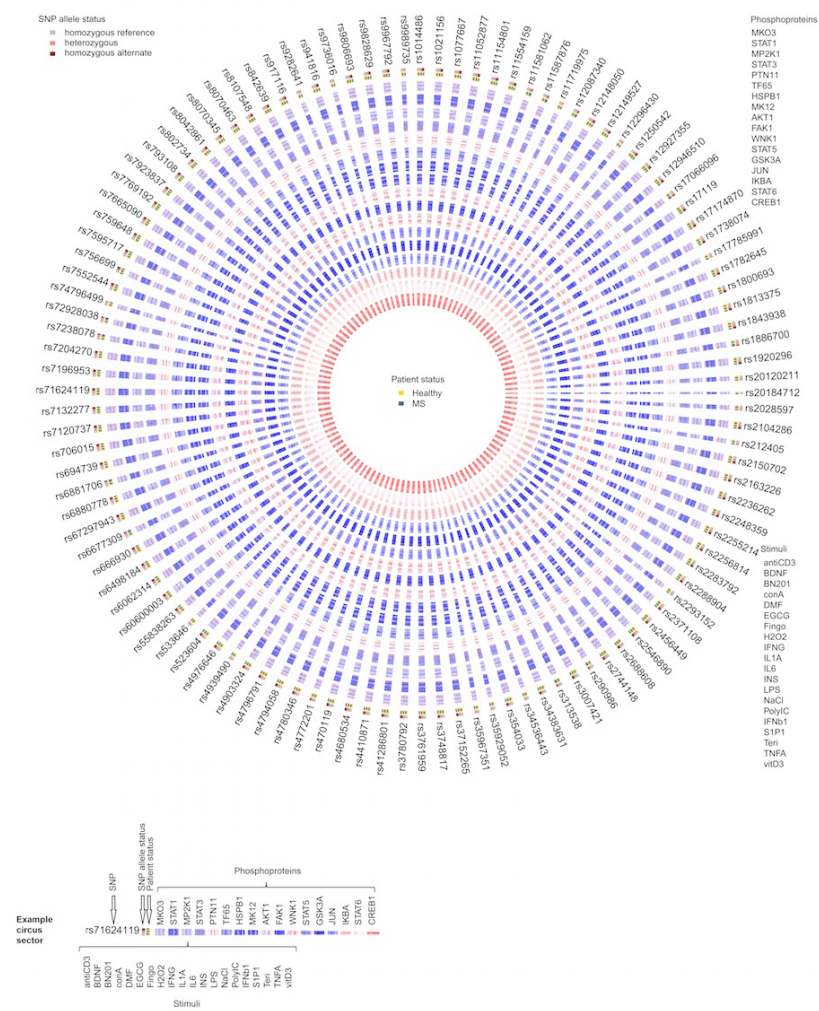

**Supplementary figure S2. Allelic distribution of MS susceptibility SNPs in MS patients and controls, and their association with the phosphoprotein levels.** For each SNP we show 6 sub-sectors: 3 for each allele variant for the two groups (MS and HC). The heat map shows the level of one of the 17 phosphoproteins in response to the 19 different stimuli for each radius. Each sector related to a given SNP at a specific radius could be considered as a separate heat map of the phosphorylation response of the selected kinase stratified by genetic variance at the position of this SNP. Circular tracks from out to in: 1) SNP name; 2) allele status of the SNP: reference homozygous (grey), heterozygous (orange), alternative homozygous (red); 3) disease status, MS (blue) or HC (yellow); 4) the combination of allele status and disease status defines the number of rows in the heat map for each specific phosphoprotein; 5) heat maps of the response of the specific phosphoproteins as a function of the overall variance in the data (from out to in): MKO3, STAT1, MP2K1, STAT3, PTN11, TF65, HSPB1, MK12, AKT1, FAK1, WNK1, STAT5, GSK3A, JUN, IKBA, STAT6, CREB1. Each phosphoprotein heat map has 4-6 rows (number of allele statuses \* number of disease statuses) and 20 columns, related to the stimuli: anti-CD3, BDNF, ConA, DMF, EGCG, FTY, H<sub>2</sub>O<sub>2</sub>, IFNG, IL1A, IL6, INS, LPS, NaCl, PolyIC, IFN $\beta$ 1a, S1P1, Teri, TNFA, vitD3. The color represents the phosphorylation response (log<sub>2</sub> [phosphorylation of the selected kinase after stimulation/ phosphorylation of the selected kinase in the medium]). Heat map: blue - lower values, red - higher values averaged over the cohort with the specific allele/disease status.

**Supplementary Table S1. Demographics and clinical variables of MS patients and controls.** Columns indicate the subjects recruited for the study, the subjects used for the xMAP study based in phosphoproteomic data that passed QC and the subjects used for the cytometry study.

|                                  | MS         |             |                 | HC        |            |                 |
|----------------------------------|------------|-------------|-----------------|-----------|------------|-----------------|
|                                  | recruited  | xMAP study  | cytometry study | recruited | xMAP study | cytometry study |
| <b>n</b>                         | 195        | 132         | 47              | 60        | 37         | 22              |
| <b>Sex (M/F)</b>                 | 66/129     | 46/86       | 14/33           | 21/39     | 11/26      | 8/14            |
| <b>Age</b>                       | 43.1+11.3  | 44.0+11.0   | 49.2+10.4       | 39.9+8.5* | 39.5+7.8   | 35.3+7.3*       |
| <b>Disease duration (months)</b> | 104.9+93.2 | 111.9+96.7  | 163.4+109.5     | --        | --         | --              |
| <b>Age at MS onset</b>           | 34.5+10.3  | 34.6+9.9    | 35.4+9.8        | --        | --         | --              |
| <b>Disease subtype</b>           |            |             |                 |           |            |                 |
| <b>CIS</b>                       | 24         | 10          | 0               | --        | --         | --              |
| <b>RRMS</b>                      | 129        | 96          | 34              | --        | --         | --              |
| <b>SPMS</b>                      | 6          | 2           | 0               | --        | --         | --              |
| <b>PPMS</b>                      | 36         | 24          | 13              | --        | --         | --              |
| <b>EDSS</b>                      | 2 (0-6.0)  | 2.7 (0-7.0) | 2 (1-7.5)       | --        | --         | --              |
| <b>DMD</b>                       |            |             |                 |           |            |                 |
| <b>IFNB</b>                      | 37         | 23          | 10              | --        | --         | --              |
| <b>GA</b>                        | 18         | 10          | 0               | --        | --         | --              |
| <b>NTZ</b>                       | 22         | 19          | 0               | --        | --         | --              |
| <b>FTY</b>                       | 20         | 13          | 11              | --        | --         | --              |
| <b>Untreated</b>                 | 98         | 58          | 13              | --        | --         | --              |

CIS: clinically isolated syndrome; RRMS: relapsing-remitting multiple sclerosis; SPMS: secondary-progressive multiple sclerosis; PPMS: primary-progressive multiple sclerosis; EDSS: expanded disability status scale; DMD: disease modifying drug; IFNB: interferon-beta1b); GA: glatiramer acetate; NTZ: natalizumab; FTY: fingolimod.

\*Control group was matched with the RRMS group.

**Supplementary Table S2. List of phosphoproteins tested by xMAP.**

| Uniprot ID Name | Entrez-gene identifier | HGNC symbol | Uniprot Recommended Name                        | Uniprot Alternative Name                    | Gene Names                | Antibody company catalog | Pathway       | Biological role and Association with MS                                                                                                                                 |
|-----------------|------------------------|-------------|-------------------------------------------------|---------------------------------------------|---------------------------|--------------------------|---------------|-------------------------------------------------------------------------------------------------------------------------------------------------------------------------|
| <b>AKT1</b>     | 207                    | AKT1        | RAC-alpha serine/threonine-protein kinase       | Protein kinase B                            | AKT1, PKB, RAC            | PAO P-AKT1-A01           | PI3K/AKT/mTOR | key mediator of PI3K and mTOR signaling pathways, all involved in cell survival                                                                                         |
| <b>CREB1</b>    | 1385                   | CREB1       | Cyclic AMP-responsive element-binding protein 1 | -                                           | CREB1                     | PAO: P-CREB1-A01         | AP-1/MAPK     | Participates in PI3K, MAPKinase pathways, promoting cell survival, neuronal activity, synaptic plasticity and expression of HLA molecules                               |
| <b>FAK1</b>     | 5747                   | PTK2        | Focal adhesion kinase 1                         | Protein phosphatase 1 regulatory subunit 71 | PTK2, FAK, FAK1           | PAO: P-FAK1-A01          | Integrin/src  | key signaling mediator of integrin receptors and axon guidance as well as growth factor receptors (PI3K pathway)                                                        |
| <b>GSK3A</b>    | 2931                   | GSK3A       | Glycogen synthase kinase-3 alpha                | Serine/threonine-protein kinase GSK3A       | GSK3A                     | PAO: P-GSK3A-A01         | PI3K/AKT/mTOR | chemokine signaling pathway, being downstream AKT                                                                                                                       |
| <b>HSPB1</b>    | 3315                   | HSPB1       | Heat shock protein beta-1                       | 28 kDa heat shock protein                   | HSPB1, HSP27, HSP28       | PAO: P-HSPB1-A01         | p38/MAPK      | Part of MAPKinase pathway, downstream p38, and promotes actin reorganization supporting cell migratio. Marked elevation in HSP27 levels during the relapse phase of MS. |
| <b>IKBA</b>     | 4792                   | NFKBIA      | NF-kappa-B inhibitor alpha                      | I-kappa-B-alpha                             | NFKBIA, IKBA, MAD3, NFKBI | PAO: P-IKBA-A01          | NFkB          | NFkB signaling                                                                                                                                                          |
| <b>JUN</b>      | 3725                   | JUN         | Transcription factor AP-1                       | Proto-oncogene c-Jun                        | JUN                       | PAO: P-JUN-A01           | JNK/MAPK      | JUN is part of the immediate early gene responses, being downstream JNK and mediating apoptosis                                                                         |



|               |       |        |                                                               |                                                |                                    |                  |           |                                                                                                                                                                                 |
|---------------|-------|--------|---------------------------------------------------------------|------------------------------------------------|------------------------------------|------------------|-----------|---------------------------------------------------------------------------------------------------------------------------------------------------------------------------------|
| <b>MP2K1</b>  | 5604  | MAP2K1 | Dual specificity mitogen-activated protein kinase kinase 1    | MEK1                                           | MAP2K1, MEK1, PRKMK1               | PAO: P-MP2K1-A01 | AP-1/MAPK | Mediates signaling of PDGFR pathway, promoting cell survival                                                                                                                    |
| <b>PTPN11</b> | 5781  | PTPN11 | Tyrosine-protein phosphatase non-receptor type 11             | SHP2                                           | PTPN11, PTP2C, SHPTP2              | PAO: P-PTN11-A01 | AP-1/MAPK | Member of the MAPKinase pathway, involved in proliferation, differentiation, cell cycle progression, cell transmigration, NK cytotoxicity and axonal guidance                   |
| <b>STA5A</b>  | 6776  | STAT5A | Signal transducer and activator of transcription 5A           | -                                              | STAT5A, STAT5                      | PAO: P-STAT5-A01 | JAK/STAT  | Mediates IL-2, chemokines, NGR3-ErbB signaling and promoting cell survival. Upon IL-7 stimulation, MS patients experience stronger STAT5 activation in CD8-EM compared with HC. |
| <b>STAT1</b>  | 6772  | STAT1  | Signal transducer and activator of transcription 1-alpha/beta | Transcription factor ISGF-3 components p91/p84 | STAT1                              | PAO: P-STAT1-A01 | JAK/STAT  | Mediates interferon gamma and beta signaling. Macrophages from MS patients displayed enhanced STAT1, STAT6 and NF-kB activity.                                                  |
| <b>STAT3</b>  | 6774  | STAT3  | Signal transducer and activator of transcription 3            | Acute-phase response factor                    | STAT3, APRF                        | PAO: P-STAT3-A01 | JAK/STAT  | Mediates IL-6, IL-10, neurocytokines (LIF) signaling. STAT3 is required for IL-17 production by Th17.                                                                           |
| <b>STAT6</b>  | 6778  | STAT6  | Signal transducer and activator of transcription 6            | IL-4 Stat                                      | STAT6                              | PAO: P-STAT6-A01 | JAK/STAT  | JAK-STAT pathway mediates IL-4 signaling. PBMCs from MS patients have significantly elevated constitutive phosphorylation of STAT6 compared to PBMCs from normal subjects.      |
| <b>TF65</b>   | 5970  | RELA   | Transcription factor p65                                      | Nuclear factor NF-kappa-B p65 subunit          | RELA, NFKB3                        | PAO: P-TF65-A01  | NFkB      | Key member of NfKB pathway, mediating inflammatory signals and cell survival. Macrophages from MS patients displayed enhanced STAT6, STAT1 and NF-kB activity.                  |
| <b>WNK1</b>   | 65125 | WNK1   | Serine/threonine-protein kinase WNK1                          | Erythrocyte 65 kDa protein                     | WNK1, HSN2, KDP, KIAA0344, PRKWNK1 | PAO: P-WNK1-A01  | ERK5/MAPK | EGF pathway and participate in the regulation of ion homeostasis and iron uptake                                                                                                |

**Supplementary Table S3. Stimulus used in the in vitro assays.**

| Stimulus | Full Name                               | pathway                               | cat number | Vendor      | stock conc | units | target conc | units |
|----------|-----------------------------------------|---------------------------------------|------------|-------------|------------|-------|-------------|-------|
| antiCD3  | Anti-Human CD3                          | TCR                                   | 16-0037-85 | eBioscience | 1          | mg/ml | 5000        | ng/ml |
| BDNF     | Brain-Derived Neurotrophic Factor human | TrkB/p75                              | B3795-5ug  | Sigma       | 0.1        | mg/ml | 100         | ng/ml |
| conA     | Concanavalin A                          | TCR                                   | C5275-5MG  | Sigma       | 5          | mg/ml | 2500        | ng/ml |
| DMF      | Dimethyl fumarate                       | Nrf2                                  | 242926     | Sigma       | 5          | mg/ml | 10000       | ng/ml |
| EGCG     | Epigallocatechin-3-gallate              | anti-oxidative stress                 | sc-200802  | Santa Cruz  | 10         | mg/ml | 45.84       | ug/ml |
| FTY      | Fingolimod                              | S1PR                                  |            | Novartis    | 1          | mg/ml | 3000        | ng/ml |
| H2O2     | Hydrogen peroxide                       | oxidative stress                      | H3410      | Sigma       | 330        | mg/ml | 17005       | ng/ml |
| IFNB1a   | Interferon beta 1a                      | Type I IFNR                           | 101322     | Merck       | 0.088      | mg/ml | 50          | ng/ml |
| IFNG     | Interferon gamma                        | Type II IFNR                          | I3265      | Sigma       | 0.1        | mg/ml | 100         | ng/ml |
| IL1A     | Interleukin-1 alpha                     | IL1R pathway                          | 200-01A    | PeptoTech   | 0.1        | mg/ml | 50          | ng/ml |
| IL6      | Interleukin-6                           | IL6R                                  | 200-06     | PeptoTech   | 0.1        | mg/ml | 100         | ng/ml |
| INS      | Insulin                                 | InsulinR                              | I9278      | Sigma       | 1.722      | mg/ml | 1722        | ng/ml |
| LPS      | Lipopolysaccharide                      | TLR4                                  | L4391      | Sigma       | 1          | mg/ml | 10000       | ng/ml |
| NaCl     | Sodium Chloride                         | PI3K                                  | S5886      | Sigma       | 11.7       | mg/ml | 2.34        | mg/ml |
| PolyIC   | Polyinosinic-Polycytidylic acid         | TLR3                                  | p0913-10mg | Sigma       | 10         | mg/ml | 10000       | ng/ml |
| S1P      | Sphingosine 1-phosphate                 | S1P                                   | S9666      | Sigma       | 0.125      | mg/ml | 100         | ng/ml |
| Teriflu  | Teriflunomide                           | pyrimidin synthesis<br>NFkB inhibitor | A77 1726   | Calbiochem  | 10         | mg/ml | 13510       | ng/ml |
| TNFA     | Tumor necrosis factor alpha             | TNF                                   | 300-01A    | PeptoTech   | 0.1        | mg/ml | 100         | ng/ml |
| vitD3    | vitamin D3                              | B-catenin                             | C9756      | Sigma       | 1          | mg/ml | 500         | ng/ml |

**Supplementary Table S4. SNPs associated with MS tested.**

| rsID        | chr | position  | RefSeq_name | RefSeq_distance |
|-------------|-----|-----------|-------------|-----------------|
| rs371522651 | 5   | 142126999 | NDFIP1      | 0               |
| rs11581062  | 1   | 101407519 | SLC30A7     | 0               |
| rs11587876  | 1   | 85915183  | DDAH1       | 0               |
| rs12087340  | 1   | 85746993  | BCL10       | 4405            |
| rs3007421   | 1   | 6530189   | PLEKHG5     | 0               |
| rs35967351  | 1   | 160711804 | SLAMF7      | 0               |
| rs3748817   | 1   | 2525665   | MMEL1       | 0               |
| rs3761959   | 1   | 157669278 | FCRL3       | 0               |
| rs41286801  | 1   | 92975464  | EVI5        | 0               |
| rs55838263  | 1   | 200874728 | C1orf106    | 0               |
| rs666930    | 1   | 120258970 | PHGDH       | 0               |
| rs6677309   | 1   | 117080166 | CD58        | 0               |
| rs7552544   | 1   | 101240893 | VCAM1       | 36291           |
| rs17174870  | 2   | 112665201 | MERTK       | 0               |
| rs2163226   | 2   | 43361256  | ZFP36L2     | 88283           |
| rs7595717   | 2   | 68587477  | PLEK        | 4843            |
| rs842639    | 2   | 61095245  | FLJ16341    | 0               |
| rs9967792   | 2   | 191974435 | STAT4       | 0               |
| rs9989735   | 2   | 231115454 | SP140       | 0               |
| rs1014486   | 3   | 159691112 | IL12A       | 15509           |
| rs11719975  | 3   | 18785585  | SATB1       | 305319          |
| rs1813375   | 3   | 28078571  | CMC1        | 204551          |
| rs1920296   | 3   | 121543577 | IQCB1       | 0               |
| rs2028597   | 3   | 105558837 | CBLB        | 0               |
| rs2255214   | 3   | 121770539 | CD86        | 3668            |
| rs2371108   | 3   | 27757018  | EOMES       | 866             |
| rs4680534   | 3   | 159698945 | IL12A       | 7676            |
| rs9282641   | 3   | 121796768 | CD86        | 0               |
| rs9828629   | 3   | 71530346  | FOXP1       | 0               |
| rs313538    | 4   | 25264754  | PI4K2B      | 0               |
| rs7665090   | 4   | 103551603 | MANBA       | 1038            |
| rs2546890   | 5   | 158759900 | LOC285626   | 0               |
| rs4976646   | 5   | 176788570 | RGS14       | 0               |
| rs6880778   | 5   | 40399096  | PTGER4      | 280934          |
| rs6881706   | 5   | 35879156  | IL7R        | 2232            |
| rs71624119  | 5   | 55440730  | ANKRD55     | 0               |
| rs756699    | 5   | 133446575 | TCF7        | 3825            |
| rs11154801  | 6   | 135739355 | AHI1        | 0               |
| rs17066096  | 6   | 137452908 | IL22RA2     | 12047           |

|                    |    |           |          |        |
|--------------------|----|-----------|----------|--------|
| <b>rs17119</b>     | 6  | 14719496  | JARID2   | 527029 |
| <b>rs1738074</b>   | 6  | 159465977 | TAGAP    | 0      |
| <b>rs212405</b>    | 6  | 159470559 | TAGAP    | 4374   |
| <b>rs67297943</b>  | 6  | 138244816 | TNFAIP3  | 40366  |
| <b>rs72928038</b>  | 6  | 90976768  | BACH2    | 0      |
| <b>rs7769192</b>   | 6  | 137962655 | OLIG3    | 147123 |
| <b>rs802734</b>    | 6  | 128278798 | PTPRK    | 11124  |
| <b>rs941816</b>    | 6  | 36375304  | PXT1     | 0      |
| <b>rs1843938</b>   | 7  | 3113034   | CARD11   | 29524  |
| <b>rs201847125</b> | 7  | 50325567  | IKZF1    | 18809  |
| <b>rs354033</b>    | 7  | 149289464 | ZNF767   | 0      |
| <b>rs60600003</b>  | 7  | 37382465  | ELMO1    | 0      |
| <b>rs706015</b>    | 7  | 27014988  | SKAP2    | 110646 |
| <b>rs917116</b>    | 7  | 28172739  | JAZF1    | 0      |
| <b>rs1021156</b>   | 8  | 79575804  | FAM164A  | 2476   |
| <b>rs2456449</b>   | 8  | 128192981 | POU5F1B  | 234874 |
| <b>rs4410871</b>   | 8  | 128815029 | PVT1     | 0      |
| <b>rs759648</b>    | 8  | 129158945 | MIR1208  | 3415   |
| <b>rs2150702</b>   | 9  | 5893861   | MLANA    | 0      |
| <b>rs290986</b>    | 9  | 93563536  | SYK      | 474    |
| <b>rs3780792</b>   | 9  | 136835343 | VAV2     | 0      |
| <b>rs1250542</b>   | 10 | 81034670  | ZMIZ1    | 0      |
| <b>rs1782645</b>   | 10 | 81048611  | ZMIZ1    | 0      |
| <b>rs2104286</b>   | 10 | 6099045   | IL2RA    | 0      |
| <b>rs2688608</b>   | 10 | 75658349  | C10orf55 | 11376  |
| <b>rs7923837</b>   | 10 | 94481917  | HHEX     | 26508  |
| <b>rs793108</b>    | 10 | 31415106  | ZNF438   | 94239  |
| <b>rs34383631</b>  | 11 | 60793330  | CD6      | 5481   |
| <b>rs4939490</b>   | 11 | 60793651  | CD6      | 5802   |
| <b>rs523604</b>    | 11 | 118755738 | CXCR5    | 0      |
| <b>rs533646</b>    | 11 | 118566746 | TREH     | 16364  |
| <b>rs694739</b>    | 11 | 64097233  | PRDX5    | 7937   |
| <b>rs7120737</b>   | 11 | 47702395  | AGBL2    | 0      |
| <b>rs9736016</b>   | 11 | 118724894 | CXCR5    | 29645  |
| <b>rs11052877</b>  | 12 | 9905690   | CD69     | 0      |
| <b>rs12296430</b>  | 12 | 6503500   | LTBR     | 2767   |
| <b>rs1800693</b>   | 12 | 6440009   | TNFRSF1A | 0      |
| <b>rs201202118</b> | 12 | 58182062  | TSMF     | 0      |
| <b>rs7132277</b>   | 12 | 123593382 | PITPNM2  | 0      |
| <b>rs4772201</b>   | 13 | 100086259 | MIR548AN | 27704  |
| <b>rs12148050</b>  | 14 | 103263788 | TRAF3    | 0      |

|                   |    |          |          |       |
|-------------------|----|----------|----------|-------|
| <b>rs2236262</b>  | 14 | 69261472 | ZFP36L1  | 1686  |
| <b>rs4903324</b>  | 14 | 75961511 | JDP2     | 22106 |
| <b>rs74796499</b> | 14 | 88432328 | GALC     | 0     |
| <b>rs8042861</b>  | 15 | 90977333 | IQGAP1   | 0     |
| <b>rs9806693</b>  | 15 | 79184387 | MORF4L1  | 0     |
| <b>rs12149527</b> | 16 | 79110596 | WVOX     | 0     |
| <b>rs12927355</b> | 16 | 11194771 | CLEC16A  | 0     |
| <b>rs1886700</b>  | 16 | 68685905 | CDH3     | 0     |
| <b>rs2744148</b>  | 16 | 1073552  | SOX8     | 36572 |
| <b>rs35929052</b> | 16 | 85994484 | IRF8     | 38272 |
| <b>rs4780346</b>  | 16 | 11288806 | CLEC16A  | 12759 |
| <b>rs6498184</b>  | 16 | 11435990 | RMI2     | 3319  |
| <b>rs7196953</b>  | 16 | 79649394 | MAF      | 14771 |
| <b>rs7204270</b>  | 16 | 30156963 | MAPK3    | 22332 |
| <b>rs12946510</b> | 17 | 37912377 | IKZF3    | 8820  |
| <b>rs2293152</b>  | 17 | 40481529 | STAT3    | 0     |
| <b>rs4794058</b>  | 17 | 45597098 | NPEPPS   | 11344 |
| <b>rs4796791</b>  | 17 | 40530763 | STAT3    | 0     |
| <b>rs8070345</b>  | 17 | 57816757 | VMP1     | 0     |
| <b>rs8070463</b>  | 17 | 45768836 | TBKBP1   | 3792  |
| <b>rs7238078</b>  | 18 | 56384192 | MALT1    | 0     |
| <b>rs1077667</b>  | 19 | 6668972  | TNFSF14  | 0     |
| <b>rs11554159</b> | 19 | 18285944 | IFI30    | 0     |
| <b>rs2288904</b>  | 19 | 10742170 | SLC44A2  | 0     |
| <b>rs34536443</b> | 19 | 10463118 | TYK2     | 0     |
| <b>rs8107548</b>  | 19 | 49870643 | DKKL1    | 0     |
| <b>rs17785991</b> | 20 | 48438761 | SLC9A8   | 0     |
| <b>rs2248359</b>  | 20 | 52791518 | CYP24A1  | 1001  |
| <b>rs2256814</b>  | 20 | 62373983 | SLC2A4RG | 0     |
| <b>rs6062314</b>  | 20 | 62409713 | ZBTB46   | 0     |
| <b>rs2283792</b>  | 22 | 22131125 | MAPK1    | 0     |
| <b>rs470119</b>   | 22 | 50966914 | TYMP     | 0     |

**Supplementary Table S5. MKO3, GSK3A, JUN and STAT3 phosphorylation levels at baseline**

| Compared Groups      | CPP                 | Mean.Group 1       | Mean.Group 2       | Wilcoxon.pval      | Adj.Wilc.pval      |
|----------------------|---------------------|--------------------|--------------------|--------------------|--------------------|
| Healthy_PPMS         | medium_STAT3        | 895.7162162        | 752.0096154        | 0.006569561        | 0.062410833        |
| Healthy_MS           | medium_MP2K1        | 2729.918919        | 3256.140152        | 0.00343999         | 0.065359817        |
| Healthy_RRMS         | <b>medium_MP2K1</b> | <b>2729.918919</b> | <b>3378.974057</b> | <b>0.001578621</b> | <b>0.029993804</b> |
| Healthy_Untreated MS | medium_MP2K1        | 2729.918919        | 3219.047414        | 0.018548558        | 0.199119244        |
| Healthy_PPMS         | medium_JUN          | 748.0743243        | 628.9423077        | 0.040138118        | 0.254208078        |
| Healthy_MS           | medium_GSK3A        | 390.3581081        | 415.592803         | 0.020288343        | 0.192739262        |
| Healthy_PPMS         | medium_GSK3A        | 390.3581081        | 436.4326923        | 0.002876038        | 0.054644714        |
| Healthy_Untreated MS | medium_GSK3A        | 390.3581081        | 425.3706897        | 0.02095992         | 0.199119244        |

**Supplementary Table S6. Differential phosphorylation and associated with SNPs in PBMCs from MS patients compared to controls.** Table shows significantly different phosphorylated proteins between MS patients and controls, based in the stimulus for the in vitro assays and the associated MS susceptibility SNPs (2-way ANOVA with Benjamin correction for multiple testing).

| Phospho      | Stimulus | SNP        | P-value  | Adjusted P-value |
|--------------|----------|------------|----------|------------------|
| <b>JUN</b>   | BDNF     | rs74796499 | 1.11E-06 | 0.000129158      |
|              | PolyIC   | rs74796499 | 0.001141 | 0.027100989      |
|              | DMF      | rs666930   | 0.000102 | 0.038705172      |
|              | INS      | rs11554159 | 0.000113 | 0.04305268       |
|              | medium   | rs7238078  | 0.00054  | 0.010257557      |
| <b>AKT1</b>  | BDNF     | rs74796499 | 1.36E-06 | 0.000129158      |
|              | IFNB1a   | rs35929052 | 0.000122 | 0.016999819      |
| <b>FAK1</b>  | BDNF     | rs74796499 | 3.89E-06 | 0.000246682      |
|              | conA     | rs74796499 | 0.00095  | 0.024074738      |
|              | IL1A     | rs74796499 | 0.000798 | 0.021671934      |
|              | PolyIC   | rs74796499 | 0.000138 | 0.004871523      |
|              | INS      | rs12087340 | 0.000309 | 0.029377875      |
|              | INS      | rs793108   | 7.60E-05 | 0.028871647      |
| <b>GSK3A</b> | BDNF     | rs74796499 | 6.50E-08 | 2.47E-05         |
|              | conA     | rs74796499 | 6.02E-05 | 0.002857279      |
|              | IL1A     | rs74796499 | 0.002312 | 0.048802245      |
|              | PolyIC   | rs74796499 | 2.46E-06 | 0.000187152      |
|              | Teriflu  | rs7552544  | 0.000109 | 0.0413861        |
| <b>MKO3</b>  | medium   | rs666930   | 0.000201 | 0.003819853      |
| <b>MP2K1</b> | IFNB1a   | rs2456449  | 2.09E-05 | 0.007948691      |
|              | medium   | rs666930   | 0.001424 | 0.013524132      |
|              | vitD3    | rs35929052 | 5.38E-05 | 0.016999819      |
| <b>STAT1</b> | BDNF     | rs74796499 | 5.00E-07 | 9.50E-05         |
|              | PolyIC   | rs74796499 | 1.34E-05 | 0.000730121      |
|              | INS      | rs12087340 | 0.00015  | 0.028588328      |
| <b>STAT3</b> | BDNF     | rs12087340 | 0.000283 | 0.029377875      |
| <b>STAT5</b> | BDNF     | rs74796499 | 0.000116 | 0.004871523      |
|              | DMF      | rs1250542  | 5.33E-05 | 0.020245562      |
|              | DMF      | rs4680534  | 8.49E-05 | 0.032274089      |
|              | medium   | rs666930   | 0.007292 | 0.034637287      |
| <b>STAT6</b> | medium   | rs666930   | 0.009487 | 0.036049416      |
| <b>TF65</b>  | IFNB1a   | rs12087340 | 0.000578 | 0.043897593      |
|              | medium   | rs3007421  | 0.002425 | 0.04607475       |
| <b>WNK1</b>  | medium   | rs666930   | 0.003471 | 0.021985849      |
|              | vitD3    | rs35929052 | 0.000134 | 0.016999819      |

BDNF: brain derived nerve factor; conA: concanavalin A; DMF: Dymethyl-fumarate;  
IFNB1a: interferon-beta; IL1A: interleukin 1A; INS: insulin; PolyIC:  
Polyinosinic:polycytidylic acid; vitD3: vitamin D3; Teriflu: Teriflunomide



**Table S7. Differential kinase phosphorylation in fingolimod-treated and untreated MS patients.** A) The table shows differentially phosphorylated targets between FTY-treated and untreated RRMS patients (Benjamin correction for multiple testing). B) Differential phosphorylation in PBMCs from RRMS patients treated with FTY or untreated, adjusted by MS susceptibility SNPs. Unstimulated phosphoprotein levels were compared using a Wilcoxon test, whereas the after stimulation phosphoproteins were normalized and compared using a T-test (mean  $\pm$  SD values).

| A            | Stimulus | Phosphorylation levels |                 | p                      | Adjusted p         |          |            |
|--------------|----------|------------------------|-----------------|------------------------|--------------------|----------|------------|
|              |          | FTY                    | Untreated RRMS  |                        |                    |          |            |
| <b>MKO3</b>  | ConA     | 2.84 $\pm$ 0.66        | 1.74 $\pm$ 1.07 | 3E-04                  | 0.029              |          |            |
| <b>PTN11</b> | IL6      | 0.93 $\pm$ 0.49        | 1.67 $\pm$ 0.78 | 9E-05                  | 0.017              |          |            |
|              | IFNB1a   | 0.20 $\pm$ 0.19        | 0.45 $\pm$ 0.22 | 2E-04                  | 0.029              |          |            |
| <b>STAT1</b> | IL6      | 0.29 $\pm$ 0.56        | 1.12 $\pm$ 0.69 | 5E-05                  | 0.017              |          |            |
| B            | Stimulus | SNP                    | Allele          | Phosphorylation levels |                    | p        | Adjusted p |
|              |          |                        |                 | FTY                    | untreated RRMS     |          |            |
| <b>CREB1</b> | IL1A     | rs6498184              | CT              | 0.5792<br>(0.0543)     | 0.2033<br>(0.1830) | 2.70E-05 | 0.0032     |
| <b>IKBA</b>  | antiCD3  | rs11581062             | AG              | -0.1404<br>(0.0617)    | 0.1127<br>(0.1352) | 0.00017  | 0.0165     |
| <b>TF65</b>  | PolyIC   | rs2293152              | GG              | 1.9980<br>(0.2358)     | 0.7934<br>(0.6810) | 0.00027  | 0.0330     |

**Table S8. Differential phosphorylation in PBMCs from Natalizumab-treated and untreated MS patients.** Differentially phosphorylated targets in NTZ-treated and untreated RRMS patients (Benjamin correction for multiple testing). The unstimulated phosphoprotein levels were compared using a Wilcoxon test (median  $\pm$  IQR), whereas phosphoprotein levels after stimulation were normalized and compared using a T-test (mean  $\pm$  SD).

|              | Stimulus       | Phosphorylation levels |                 | p     | Adjusted p |
|--------------|----------------|------------------------|-----------------|-------|------------|
|              |                | NTZ                    | untreated RRMS  |       |            |
| <b>MP2K1</b> | LPS            | 1.37 $\pm$ 0.49        | 1.88 $\pm$ 0.68 | 2E-04 | 0.043      |
| <b>STAT3</b> | INS            | 0.08 $\pm$ 0.14        | 0.24 $\pm$ 0.26 | 4E-04 | 0.049      |
| <b>STAT5</b> | IFN $\beta$ 1a | 1.53 $\pm$ 0.512       | 0.98 $\pm$ 0.44 | 1E-04 | 0.043      |
| <b>STAT6</b> | baseline       | 1940 $\pm$ 806         | 3058 $\pm$ 3059 | 0.002 | 0.038      |

**Supplementary Table S9. Antibodies used for flow cytometry assays.**

| <b>Antibody</b> | <b>Company</b> | <b>Catalog</b> | <b>dilution<br/>(<math>\mu</math>l in 100<math>\mu</math>l)</b> |
|-----------------|----------------|----------------|-----------------------------------------------------------------|
| CD4             | B&D            | 560649         | 2.5                                                             |
| CD8             | B&D            | 555369         | 10                                                              |
| CD33            | B&D            | 345799         | 5                                                               |
| CD19            | B&D            | 332780         | 5                                                               |
| pCREB1          | B&D            | 558435         | 20                                                              |
| pHSPB1          | Cell signaling | 12172          | 2                                                               |
| pIKBA           | B&D            | 560817         | 5                                                               |
| pMK03           | B&D            | 612592         | 20                                                              |
| pMK12           | B&D            | 612594         | 20                                                              |
| pSTAT1          | B&D            | 612596         | 20                                                              |
| pSTAT3          | B&D            | 557814         | 20                                                              |
| pSTAT5          | B&D            | 612598         | 20                                                              |
| pWNK1           | B&D            | 558421         | 20                                                              |

**Supplementary Table S10. Phosphoproteins assessed by flow cytometry.** Table indicates patient's subgroup, phosphoprotein and stimuli used in the ex vivo assays.

| <b>Group</b>          | <b>Kinase</b> | <b>Stimuli</b>               |
|-----------------------|---------------|------------------------------|
| <b>HC</b>             | STAT3         | IFNG, IFNB1a, IL6            |
|                       | CREB1         | PolyIC, FTY, DMF, INS        |
|                       | HSPB1         | TNFa, IL6, BDNF              |
|                       | MK12          | Anti-CD3, TNFA, BDNF, IFNB1a |
|                       | WNK1          | INS, IL1, BDNF, LPS          |
|                       | STAT5         | DMF, IFNB1a, polyC, ConA     |
| <b>MS untreated</b>   | STAT3         | IFNG, IFNB1a, IL6            |
|                       | CREB1         | PolyIC, BN201, FTY, DMF      |
|                       | HSPB1         | NaCl                         |
|                       | MK03          | TNFa                         |
| <b>RRMS untreated</b> | STAT1         | ECGC, anti-CD3               |
|                       | IKBA          | BDNF, INS polyIC             |
|                       | CREB1         | INS                          |
|                       | HSPB1         | TNFa, IL6, BDNF              |
|                       | MK12          | Anti-CD3, TNFA, BDNF, IFNB1a |
| <b>PPMS</b>           | STAT1         | ECGC, antiCD3                |
|                       | IKBA          | BDNF, INS, polyIC            |
|                       | STAT3         | IFNG, IFNB1a, IL6            |
|                       | WNK1          | INS, IL1, BDNF, LPS          |
|                       | STAT5         | DMF, IFNB1a, polyIC, ConA    |
| <b>FTY treated</b>    | HSPB1         | NaCl                         |
| <b>IFNB treated</b>   | MK03          | TNFa                         |

**Table S11. Differential kinase phosphorylation in PBMCs from MS patients and controls assessed by flow cytometry.** The table shows the targets phosphorylated in MS patients relative to the healthy controls, indicating the stimuli used in the in vitro assays and the immune cell subpopulation (Benjamin correction for multiple tests). Unstimulated (baseline) phosphoprotein levels were compared using a Wilcoxon test (median  $\pm$  IQR values), whereas the phosphoprotein levels after stimulation were normalized and compared using a T-test (mean  $\pm$  SD).

|                              |       | Stimulus | Cell type         | Kinase phosphorylation  |                        | P      | Adjusted p |
|------------------------------|-------|----------|-------------------|-------------------------|------------------------|--------|------------|
|                              |       |          |                   | HC                      | MS                     |        |            |
| <b>HC vs MS</b>              | HSPB1 | BDNF     | CD33 <sup>+</sup> | -0.0802<br>$\pm$ 0.1299 | 0.2117<br>$\pm$ 0.1909 | 0.0224 | 0.044      |
|                              | STAT3 | baseline | CD19 <sup>+</sup> | 495 $\pm$ 103           | 561 $\pm$ 101          | 0.0003 | 0.0119     |
| <b>HC vs PPMS</b>            | STAT1 | baseline | CD19 <sup>+</sup> | 459 $\pm$ 50            | 530 $\pm$ 54.5         | 0.0059 | 0.0436     |
|                              | STAT3 | baseline | CD19 <sup>+</sup> | 495 $\pm$ 103           | 561 $\pm$ 55.2         | 0.0035 | 0.0436     |
|                              | TF65  | baseline | CD19 <sup>+</sup> | 406 $\pm$ 41            | 476.5 $\pm$ 84.5       | 0.0044 | 0.0436     |
|                              |       |          |                   | <b>FTY</b>              | <b>Untreated MS</b>    |        |            |
| <b>FTY vs Untreated RRMS</b> | HSPB1 | NaCl     | CD19 <sup>+</sup> | 0.3155 $\pm$ 0.5195     | -0.1422 $\pm$ 0.2014   | 0.0291 | 0.0291     |

## References

1. Chen YA & Eschrich SA (2014) Computational methods and opportunities for phosphorylation network medicine. *Transl Cancer Res* 3(3):266-278.
2. International Multiple Sclerosis Genetics C, *et al.* (2013) Analysis of immune-related loci identifies 48 new susceptibility variants for multiple sclerosis. *Nat Genet* 45(11):1353-1360.
3. Razick S, Magklaras G, & Donaldson IM (2008) iRefIndex: a consolidated protein interaction database with provenance. *BMC Bioinformatics* 9:405.
4. Paull EO, *et al.* (2013) Discovering causal pathways linking genomic events to transcriptional states using Tied Diffusion Through Interacting Events (TieDIE). *Bioinformatics* 29(21):2757-2764.
